# Supplementary material for: Phosphorus–phosphorus coupling in a diphosphine with a ten bond P⋯P separation
Source: Royal Society of Chemistry journal article supplement (doi:10.1039/b602605b), 2006-01-01

## Electronic supplementary information for

### Phosphorus-phosphorus coupling in a diphosphine with a ten bond P•••P separation†

P. Kuhn<sup>a</sup>, C. Jeunesse<sup>a</sup>, D. Matt<sup>\*a</sup>, J. Harrowfield<sup>b</sup>, L. Ricard<sup>c</sup>

#### Solid state NMR for 3

Solid state <sup>31</sup>P NMR was performed on a Brücker Avance-300 spectrometer equipped with a MAS 4 mm H/X probe at 121.422 MHz. Chemical shifts are given relative to (NH<sub>4</sub>)<sub>2</sub>HPO<sub>4</sub> (0 ppm)

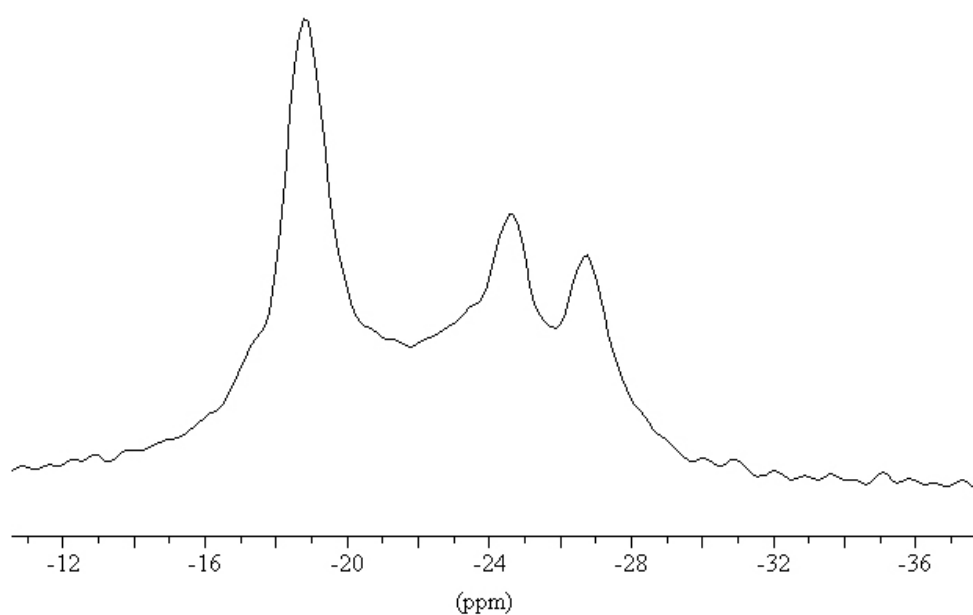

Supplement: b602605b.pdf [file b602605b.pdf]
